# Supplementary material
Source: HighWire-hosted journal article supplement (https://bmjopen.bmj.com/content/6/6/e010224)

**Appendix 1: Patient Pathway at the UCC at Charing Cross Hospital, reproduced from Gnani et al. (2013)[4]**

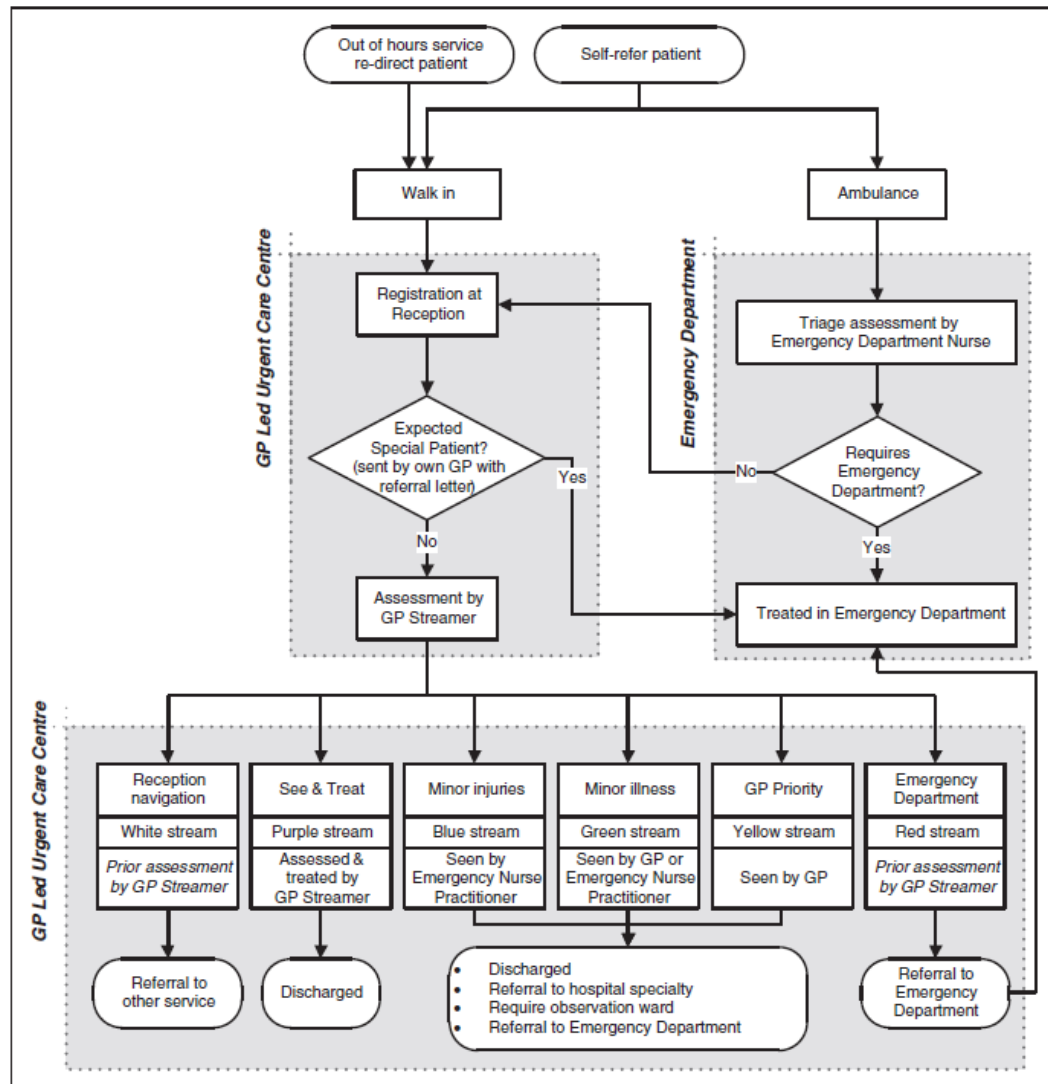

Supplement: inline-supplementary-material-1 [file inline-supplementary-material-1.pdf]
